# Supplementary material for: Noble-metal-free Ni3N/g-C3N4 photocatalysts with enhanced hydrogen production under visible light irradiation
Source: Royal Society of Chemistry journal article supplement (doi:10.1039/c8dt02456a), 2018-01-01
Supplement: c8dt02456a1.pdf [file c8dt02456a1.pdf]

## Supplementary Material

### **Noble-metal-free Ni<sub>3</sub>N/g-C<sub>3</sub>N<sub>4</sub> photocatalysts with enhanced hydrogen production under visible light irradiation**

Lu Chen,<sup>a</sup> Huijuan Huang,<sup>a</sup> Yuanhui Zheng,<sup>a,b,\*</sup> Wenhao Sun,<sup>a</sup> Yi Zhao,<sup>a</sup>

Paul Francis,<sup>b,\*</sup> Xuxu Wang<sup>a,\*</sup>

<sup>a</sup>State Key Laboratory of Photocatalysis on Energy and Environment, College of Chemistry, Fuzhou University, Fuzhou, Fujian, 350116, China

<sup>b</sup>Centre for Chemistry and Biotechnology, School of Life and Environmental Sciences, Faculty of Science, Engineering and Built Environment, Deakin University, Waurn Ponds, Victoria 3216, Australia

\*yuanhui.zheng@fzu.edu.cn; paul.francis@deakin.edu.au; xwang@fzu.edu.cn

## Computational Methods and Results

All calculations were performed using density functional theory (DFT) within the plane-wave pseudopotential as implemented in the VASP<sup>1</sup> code with a cutoff energy of 450 eV. The Perdew, Burke, and Ernzerhof (PBE) exchange-correlation functional within a generalized gradient approximation (GGA)<sup>2</sup> was employed. The PAW<sup>3</sup> method was used to describe the effect of core electrons. Gamma-centered k-point meshes of  $3 \times 3 \times 1$  were used. The atomic positions were relaxed until the force on each atom was less than 0.01 eV/Å. Using the periodic slab model and self-consistent dipole correction, the averaging electrostatic potential in the planes perpendicular to the slab normal could be obtained. We built a periodic slab with Ni<sub>3</sub>N (111) facets,  $1 \times 1$  surface unit cells were used. The bottom two layers are fixed, while the top two layers are relaxed during the calculation. The vacuum gap thickness was set to be 15 Å. The work function of Ni<sub>3</sub>N (111) facets is calculated to be 5.29 eV.

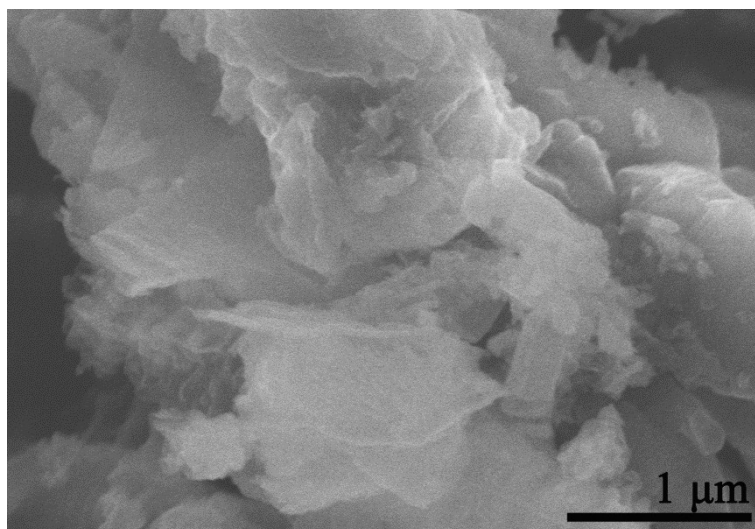

Fig. S1. SEM images of the as-prepared g-C<sub>3</sub>N<sub>4</sub> sample.

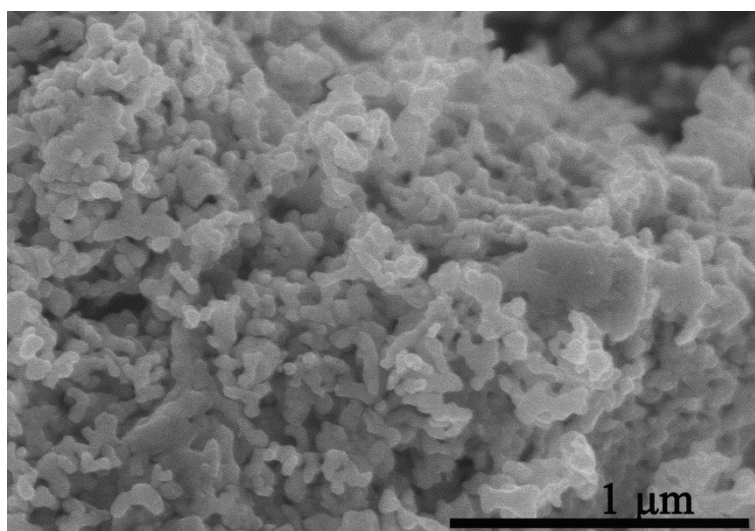

Fig. S2. SEM images of the as-prepared Ni<sub>3</sub>N sample.

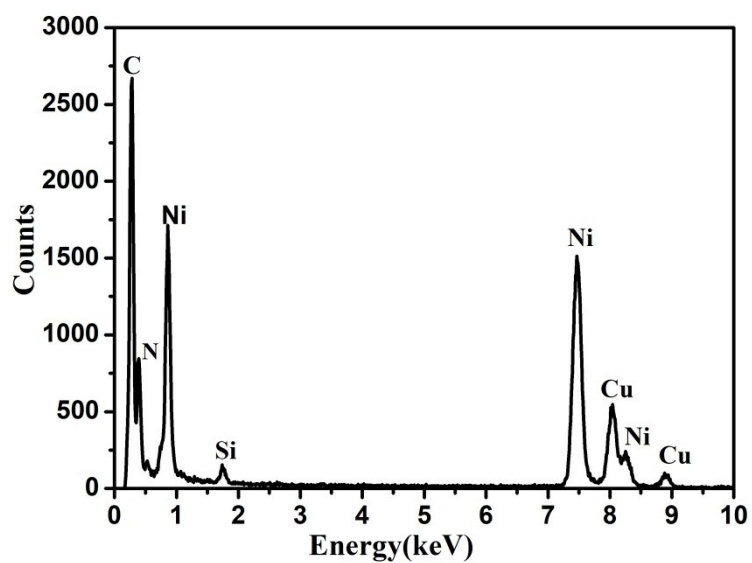

Fig. S3. Energy dispersive x-ray (EDX) spectrum of  $\text{Ni}_3\text{N}$  (3wt%)/ $\text{g-C}_3\text{N}_4$  sample.

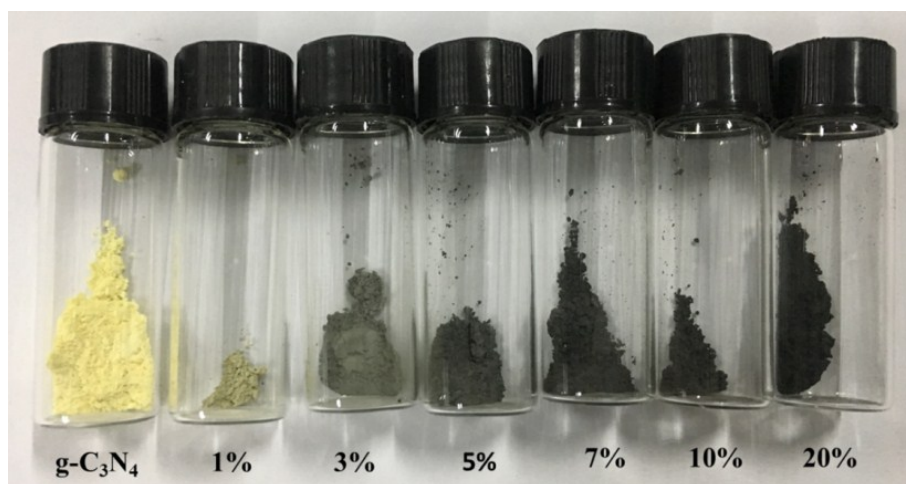

Fig. S4. Digital photographs of the as-prepared samples with different  $\text{Ni}_3\text{N}$  loading concentration.

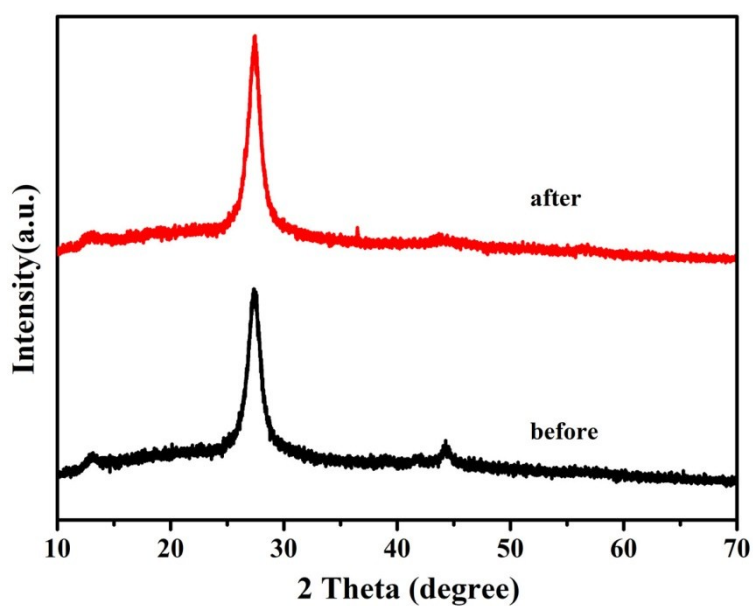

Fig. S5. XRD patterns of a 3%  $\text{Ni}_3\text{N}/\text{g-C}_3\text{N}_4$  sample before and after  $\text{H}_2$  evolution testing.

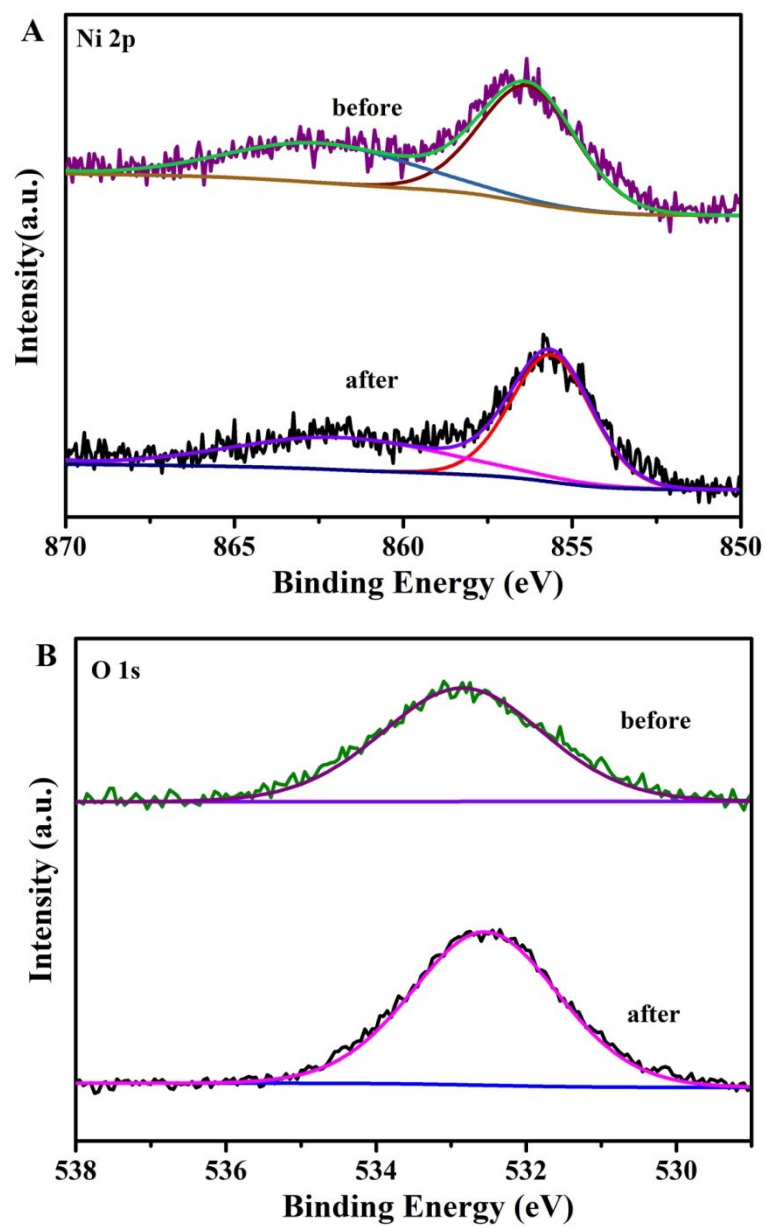

Fig.S6. XPS spectra of (a) Ni 2p<sub>3/2</sub> and (b) O 1s of 3% Ni<sub>3</sub>N/g-C<sub>3</sub>N<sub>4</sub> before and after irradiation

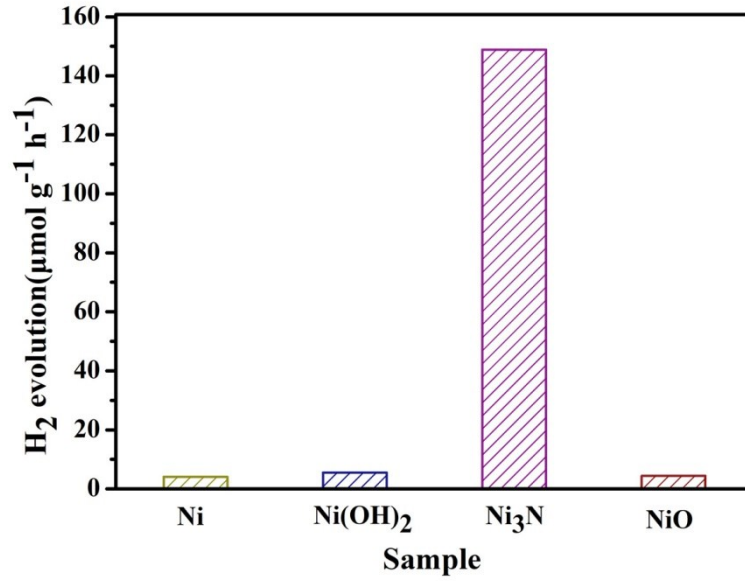

Fig.S7. Photocatalytic performance of Ni/g-C<sub>3</sub>N<sub>4</sub>, Ni(OH)<sub>2</sub>/g-C<sub>3</sub>N<sub>4</sub>, Ni<sub>3</sub>N/g-C<sub>3</sub>N<sub>4</sub> and NiO/g-C<sub>3</sub>N<sub>4</sub>

## References

1. Kresse, G.; Furthmüller, J. Phys. Rev. B 1996, 54, 11169-11186.
2. Perdew, J. P.; Burke, K.; Ernzerhof, M. Phys. Rev. Lett. 1996, 77, 3865-3868.
3. Blochl, P. E. Phys. Rev. B 1994, 50, 17953-17979
